# Supplementary material for: Derivation and external validation of a risk prediction algorithm to estimate future risk of cardiovascular death among patients with type 2 diabetes and incident diabetic nephropathy: prospective cohort study
Source: PubMed Central journal article supplement (PMC6861120; doi:10.1136/bmjdrc-2019-000735), 2019-11-13
Supplement: bmjdrc-2019-000735supp001.pdf [file bmjdrc-2019-000735supp001.pdf]

**Supplemental Table 1.** Potential predictors to derive the prediction score

| NO | Predictors                                                                                                                                                                                                                                                                                                                      | Terms included before backward elimination                                                                                             | Included in the final model |
|----|---------------------------------------------------------------------------------------------------------------------------------------------------------------------------------------------------------------------------------------------------------------------------------------------------------------------------------|----------------------------------------------------------------------------------------------------------------------------------------|-----------------------------|
| 1  | Gender                                                                                                                                                                                                                                                                                                                          | Binary (Male=1; Female=0)                                                                                                              | Yes                         |
| 2  | Age                                                                                                                                                                                                                                                                                                                             | 2 polynomial terms (as presented in Table-2)                                                                                           | Yes                         |
| 3  | Body mass index                                                                                                                                                                                                                                                                                                                 | 2 polynomial terms (as presented in Table-2)                                                                                           | Yes                         |
| 4  | Systolic blood pressure                                                                                                                                                                                                                                                                                                         | Binary (=1 if SBP $\geq$ 150mmHg, =0 if SBP<150mmHg)                                                                                   | Yes                         |
| 5  | Diastolic blood pressure                                                                                                                                                                                                                                                                                                        | Binary (=1 if DBP $\geq$ 90mmHg, =0 if SBP<90mmHg)                                                                                     | Yes                         |
| 6  | Fasting glucose                                                                                                                                                                                                                                                                                                                 | 2 polynomial terms (as presented in Table-2)                                                                                           | Yes                         |
| 7  | HbA1c                                                                                                                                                                                                                                                                                                                           | Binary (=1 if HbA1c $\geq$ 62.8mmol/mol, =0 if HbA1c<62.8mmol/mol)                                                                     | No                          |
| 8  | Total cholesterol                                                                                                                                                                                                                                                                                                               | Binary ((=1 if LDL $\geq$ 4.3mmol/L, =0 if LDL<4.3mmol/L)                                                                              | No                          |
| 9  | High density lipoprotein                                                                                                                                                                                                                                                                                                        | 2 polynomial terms (as presented in Table-2)                                                                                           | Yes                         |
| 10 | Triglyceride                                                                                                                                                                                                                                                                                                                    | 2 polynomial terms (as presented in Table-2)                                                                                           | Yes                         |
| 11 | Low density lipoprotein                                                                                                                                                                                                                                                                                                         | Binary ((=1 if LDL $\geq$ 2.6mmol/L, =0 if LDL<2.6mmol/L)                                                                              | Yes                         |
| 12 | International Normalized Ratio $\geq$ 0.86 or D-Dimer $\geq$ 0.15 or Fibrinogen $\geq$ 3.19 or Thrombin time $\geq$ 14.8                                                                                                                                                                                                        | Binary (=1 if any item presented in the left cell above the threshold, =0 if all items presented in the left cell below the threshold) | Yes                         |
| 13 | Prothrombin Time Activity $\geq$ 128 or Activated partial thromboplastin time $\geq$ 33.56 or Prothrombin Time $\geq$ 9.8                                                                                                                                                                                                       | Binary (=1 if any item presented in the left cell above the threshold, =0 if all items presented in the left cell below the threshold) | Yes                         |
| 14 | Thyroid-stimulating hormone $\geq$ 2.04 or Free Thyroxine $\geq$ 11.93 or Free Triiodothyronine $\geq$ 4.24                                                                                                                                                                                                                     | Binary (=1 if any item presented in the left cell above the threshold, =0 if all items presented in the left cell below the threshold) | Yes                         |
| 15 | Magnesium $\geq$ 0.93 or Phosphorus $\geq$ 1.23 or Potassium $\geq$ 4.36 or Sodium $\geq$ 141                                                                                                                                                                                                                                   | Binary (=1 if any item presented in the left cell above the threshold, =0 if all items presented in the left cell below the threshold) | Yes                         |
| 16 | HCO <sub>3</sub> $\geq$ 23.6 or Chlorine $\geq$ 102.3 or Calcium $\geq$ 2.23                                                                                                                                                                                                                                                    | Binary (=1 if any item presented in the left cell above the threshold, =0 if all items presented in the left cell below the threshold) | Yes                         |
| 17 | Total bilirubin $\geq$ 7.2 or Total protein $\geq$ 63.4                                                                                                                                                                                                                                                                         | Binary (=1 if any item presented in the left cell above the threshold, =0 if all items presented in the left cell below the threshold) | Yes                         |
| 18 | Cholinesterase $\geq$ 6.85 or Alanine transaminase $\geq$ 16 or Gamma glutamyl transtransferase $\geq$ 23 or Alkaline phosphatase $\geq$ 74                                                                                                                                                                                     | Binary (=1 if any item presented in the left cell above the threshold, =0 if all items presented in the left cell below the threshold) | Yes                         |
| 19 | Direct bilirubin $\geq$ 3.4 or Globulin $\geq$ 25.48 or Indirect Bilirubin $\geq$ 3.7                                                                                                                                                                                                                                           | Binary (=1 if any item presented in the left cell above the threshold, =0 if all items presented in the left cell below the threshold) | Yes                         |
| 20 | Prealbumin $\geq$ 234.04 mg/dl or Total bile acid $\geq$ 3.90 $\mu$ mol/L or Albumin $\geq$ 39.60 g/L or Aspartate transaminase $\geq$ 17.00 U/L                                                                                                                                                                                | Binary (=1 if any item presented in the left cell above the threshold, =0 if all items presented in the left cell below the threshold) | No                          |
| 21 | Urine specific gravity $\geq$ 1.01 or 24-hour total urine protein $\geq$ 0.86 or urea $\geq$ 7.38                                                                                                                                                                                                                               | Binary (=1 if any item presented in the left cell above the threshold, =0 if all items presented in the left cell below the threshold) | Yes                         |
| 22 | 24-hour total urine amount $\geq$ 2.0L or Urine microalbumin $\geq$ 149.07mg/L/24-hour or pH of urine sample $\geq$ 6.0 or Urine total protein $\geq$ 421.10mg/24 h or Creatinine $\geq$ 86.0 $\mu$ mol/L or Urine acid $\geq$ 303.0 $\mu$ mol/L or Estimated glomerular filtration rate $\geq$ 35.79 mL/min/1.73m <sup>2</sup> | Binary (=1 if any item presented in the left cell above the threshold, =0 if all items presented in the left cell below the threshold) | No                          |
| 23 | Basophil $\geq$ 0.03 $\times$ 10 <sup>9</sup> /L or Eosinophil granulocyte $\geq$ 0.13 $\times$ 10 <sup>9</sup> /L or Mean corpuscular haemoglobin $\geq$ 29.9 or Platelet distribution width $\geq$ 16.75 or Plateletcrit $\geq$ 0.169% or Monocytes $\geq$ 7.5%                                                               | Binary (=1 if any item presented in the left cell above the threshold, =0 if all items presented in the left cell below the threshold) | Yes                         |
| 24 | Lymphocyte $\geq$ 26.1% or Neutrophil $\geq$ 63% or Haemoglobin $\geq$ 117                                                                                                                                                                                                                                                      | Binary (=1 if any item presented in the left cell above the threshold, =0 if all items presented in the left cell below the threshold) | Yes                         |

|    |                                                                                                                                                                                                                                      |                                                                                                                                        |     |
|----|--------------------------------------------------------------------------------------------------------------------------------------------------------------------------------------------------------------------------------------|----------------------------------------------------------------------------------------------------------------------------------------|-----|
| 25 | Haematocrit $\geq 0.37$ or Red blood cell distribution width $\geq 13.6\%$ or Neutrophil $\geq 4.2 \times 10^9/L$ or Mean corpuscular haemoglobin concentration $\geq 329$ g/L                                                       | Binary (=1 if any item presented in the left cell above the threshold, =0 if all items presented in the left cell below the threshold) | Yes |
| 26 | Lymphocyte $\geq 1.7 \times 10^9/L$ or Mean corpuscular volume $\geq 91$ fL or Monocytes $\times 10^9/L \geq 0.5$                                                                                                                    | Binary (=1 if any item presented in the left cell above the threshold, =0 if all items presented in the left cell below the threshold) | Yes |
| 27 | Basophil $\geq 0.5\%$ or Eosinophil granulocyte $\geq 2.0\%$ or Mean platelet volume $\geq 91.0$ fL or Plateletcrit $\geq 0.17\%$ or Red blood cell $\geq 4.29 \times 10^{12}/L$ or White blood cell count $\geq 6.55 \times 10^9/L$ | Binary (=1 if any item presented in the left cell above the threshold, =0 if all items presented in the left cell below the threshold) | No  |

Cut-offs for the continuous laboratory test items were chosen by testing the 25<sup>th</sup>, 50<sup>th</sup> and 75<sup>th</sup> percentile in the derivation cohort was tested. The model with predictors using median as cut-offs was the best fitted model.
